# Supplementary material for: From nano to microcrystals: effects of different synthetic pathways on the defect architecture in heavily Gd-doped ceria
Source: Royal Society of Chemistry journal article supplement (doi:10.1039/c6cp08173h), 2017-01-01
Supplement: c6cp08173h1.pdf [file c6cp08173h1.pdf]

## Supporting Information:

**From nano to microcrystals: effect of different synthetic pathways on defects architecture in heavily Gd-doped ceria.**

M. Coduri<sup>1</sup>, M. Scavini<sup>2,3</sup>, M. Pani<sup>4,5</sup>, M. M. Carnasciali<sup>4,6</sup>, H. Klein<sup>7</sup>, C. Artini<sup>4,8</sup>

<sup>1</sup> ESRF – The European Synchrotron, 71, Avenue des Martyrs, 38000 Grenoble, France

<sup>2</sup> Dipartimento di Chimica, Università Degli Studi di Milano, via Golgi 19, 20133 Milano, Italy

<sup>3</sup> CNR-ISTM, Ist. Sci. & Tecnol. Mol., I-20133 Milano, Italy

<sup>4</sup> DCCI, Department of Chemistry and Industrial Chemistry, University of Genova, Via Dodecaneso 31, 16146 Genova, Italy

<sup>5</sup> CNR-SPIN Genova, Corso Perrone 24, 16152 Genova, Italy

<sup>6</sup> INSTM, Genova Research Unit, Via Dodecaneso 31, 16146 Genova, Italy

<sup>7</sup> Institut Néel, CNRS, Grenoble F-38042, France

<sup>8</sup> CNR-ICMATE, Via De Marini 6, 16149 Genova, Italy

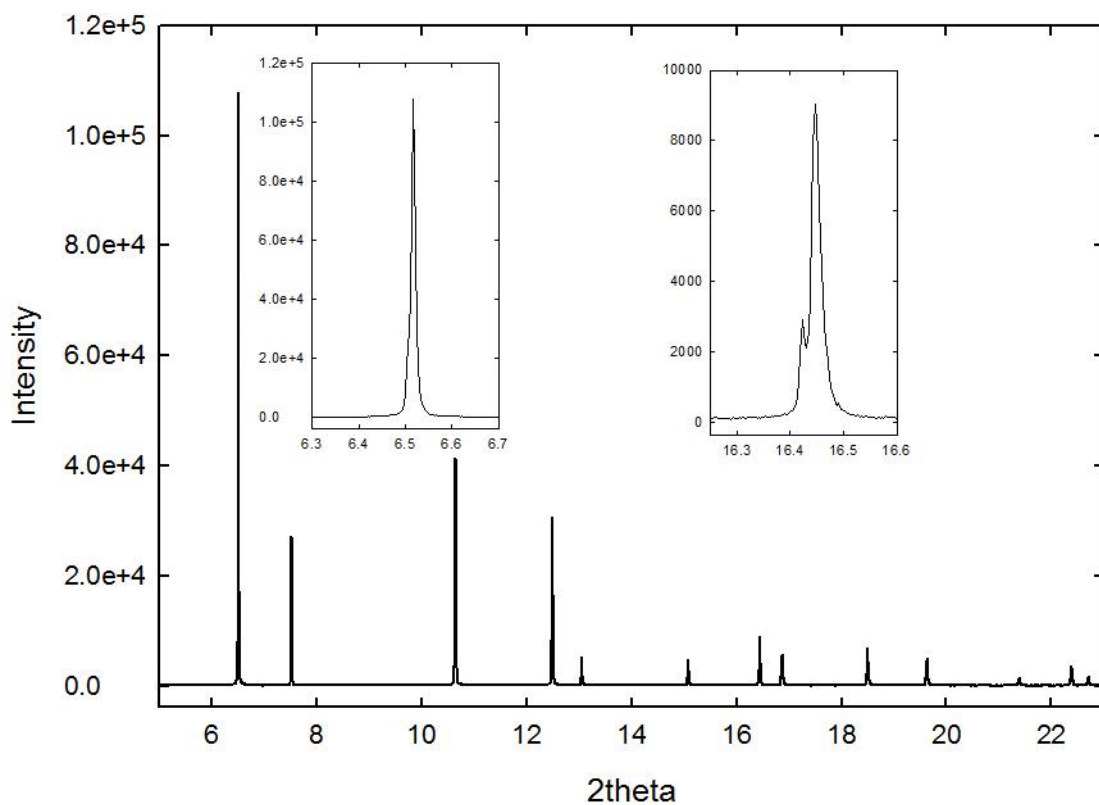

**Figure S11.** Experimental XRPD pattern on a Gd-doped ceria sample collected at the ID22 high resolution beamline of the ESRF. Although a first glance suggests a monophasic sample, high angle data reveal sample inhomogeneity.

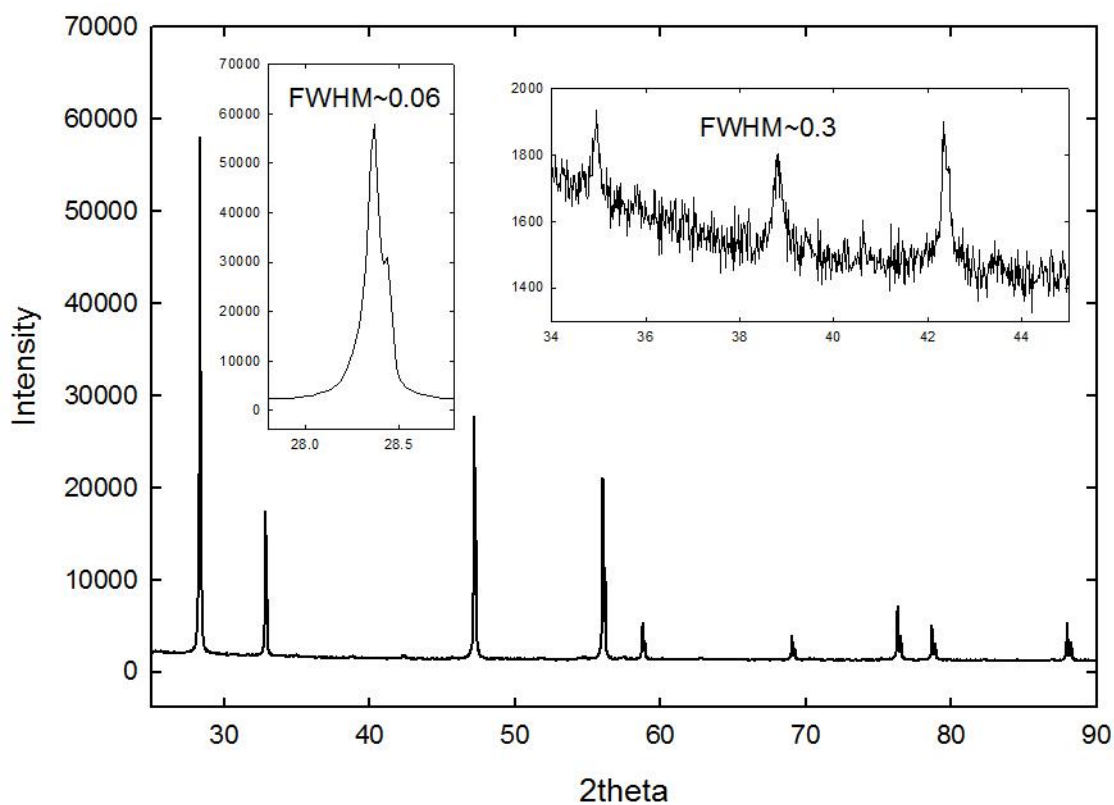

**Figure S12.** Experimental XRPD pattern on a Gd-doped ceria sample collected on a Panalytical X'Pert Pro diffractometer. The profiles are very sharp and the width of the structure peaks is comparable to that of a

standard, even though some asymmetry is observed on the left-hand part of the main peaks. Superstructure peaks are broader than the main ones.

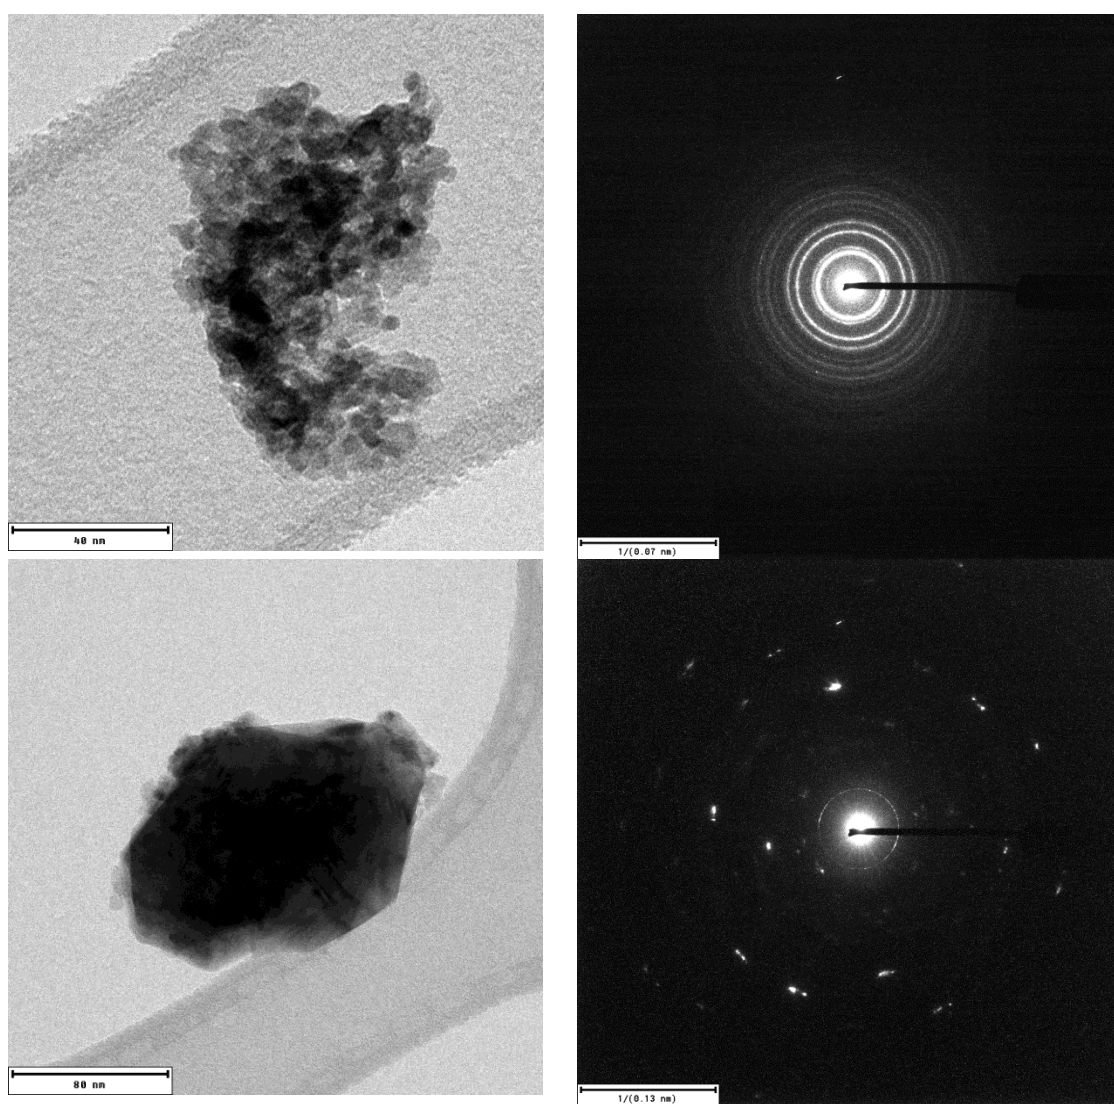

**Figure SI3.** TEM images recorded on sample with Gd313 composition, top: *sg*500, bottom: *sg*900. The corresponding electron diffraction pattern is displayed on the right, showing a high (*sg*500) and a poor (*sg*900) powder averaging, according to the different size distributions.

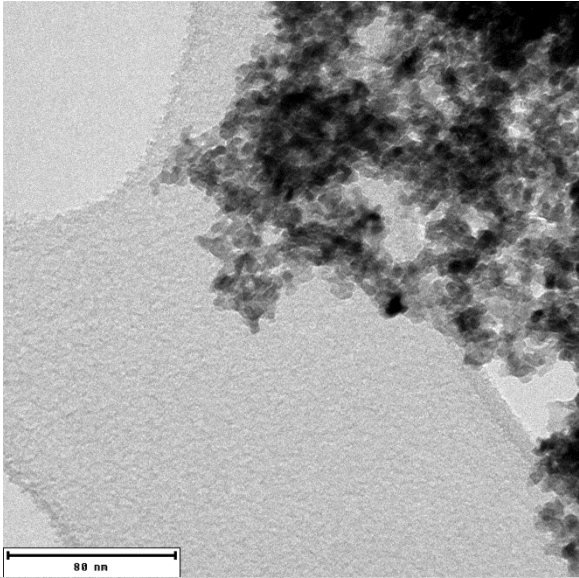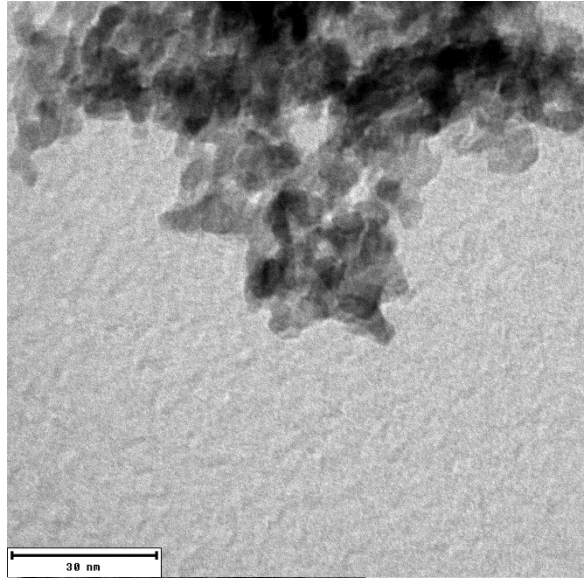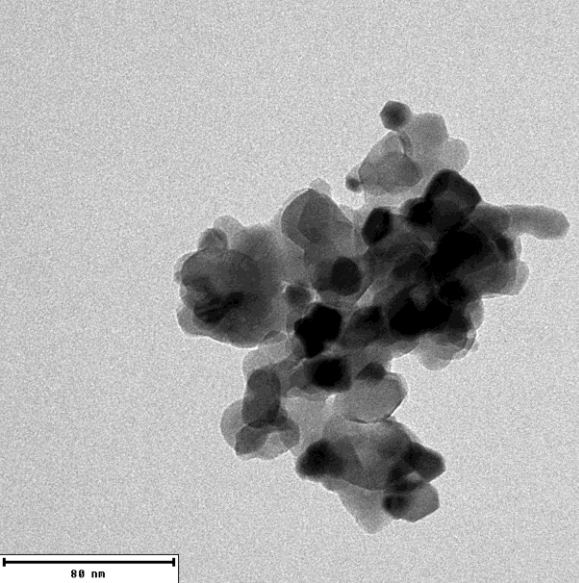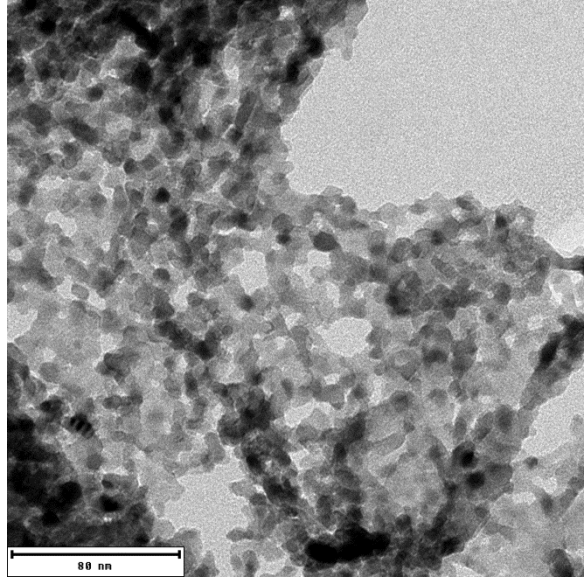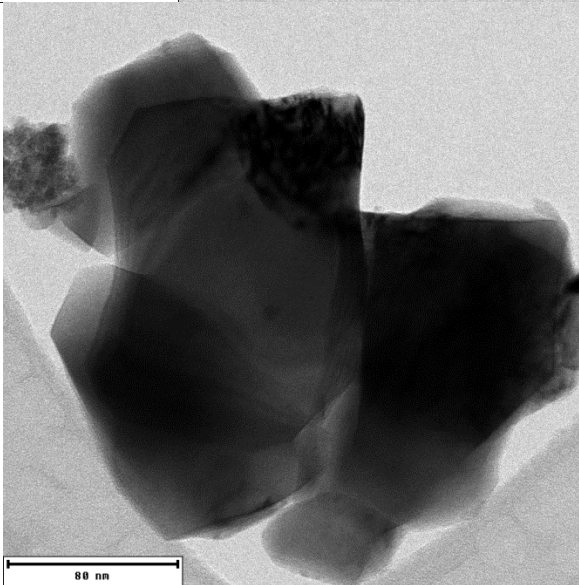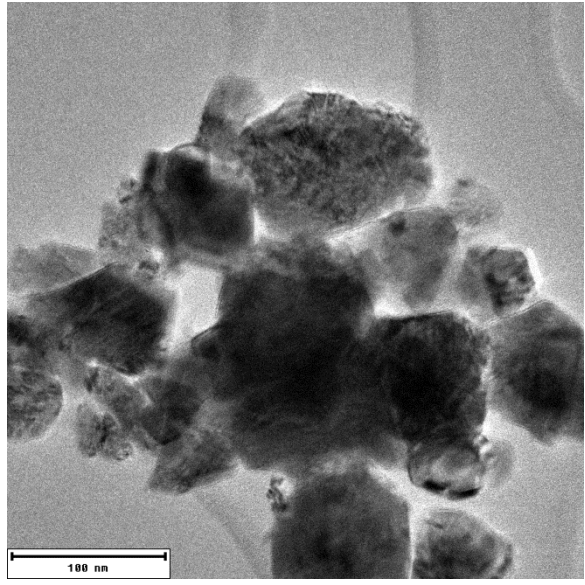

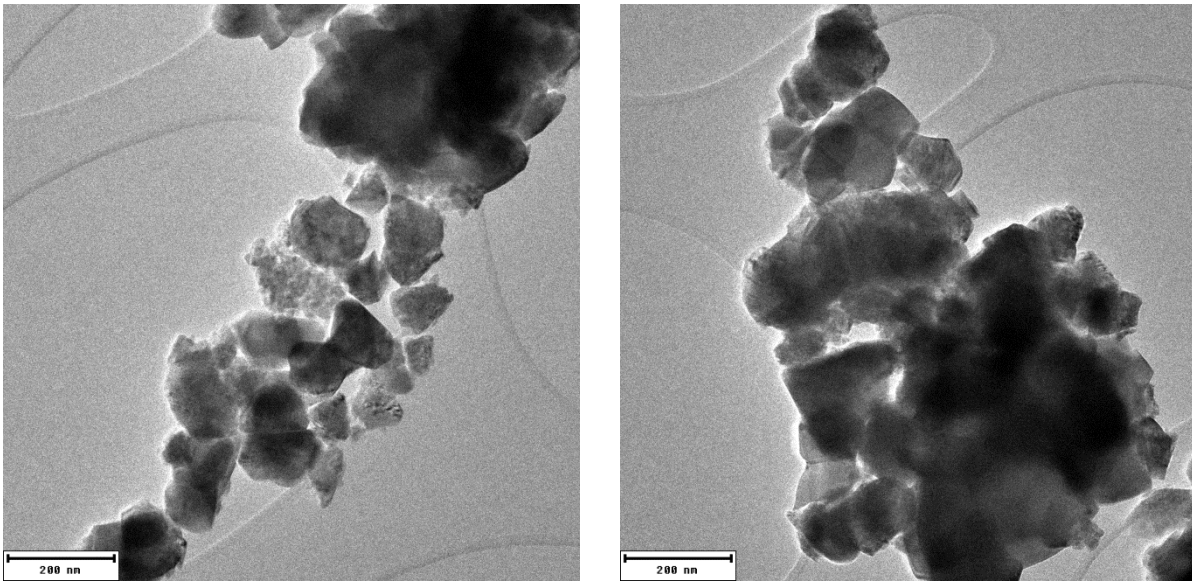

**Figure SI4.** TEM - Bright field images recorded, from top to bottom, on Gd313 sg500, Gd375 sg500, Gd313 sg900, Gd375 sg900.

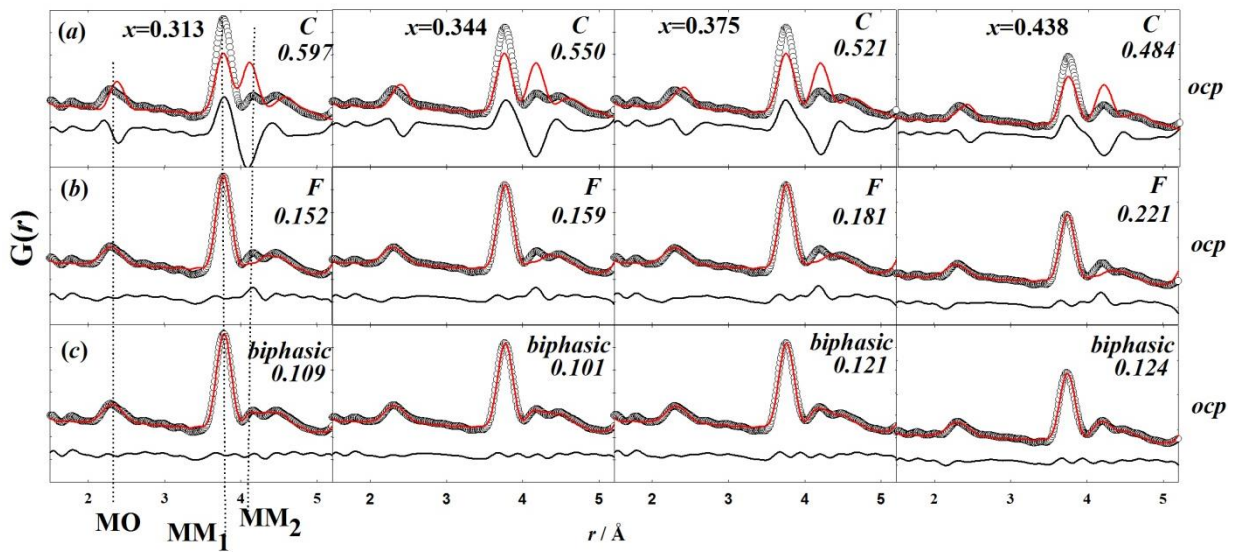

**Figure SI5.** Refinements of the local scale of PDF data for (a) single C-type, (b) single fluorite and (c) biphasic model for the four compositions investigated prepared via *ocp*. The fit residual  $R_w$  is indicated in each panel.

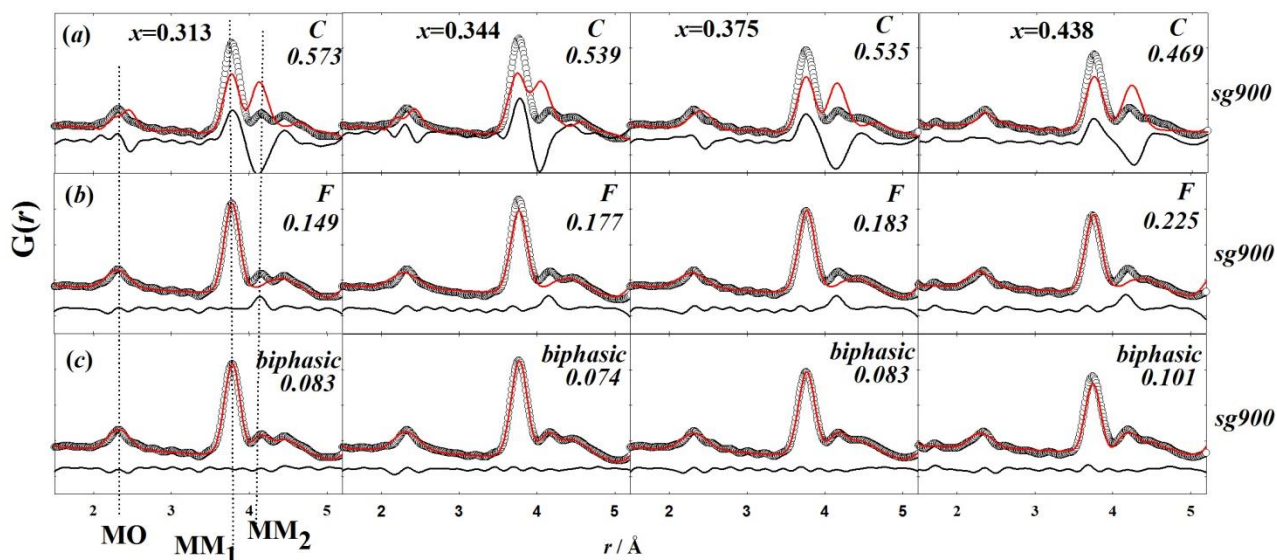

**Figure SI6.** Refinements of the local scale of PDF data for (a) single C-type, (b) single fluorite and (c) biphasic model for the four compositions investigated prepared via sg900. The fit residual  $R_w$  is indicated in each panel.

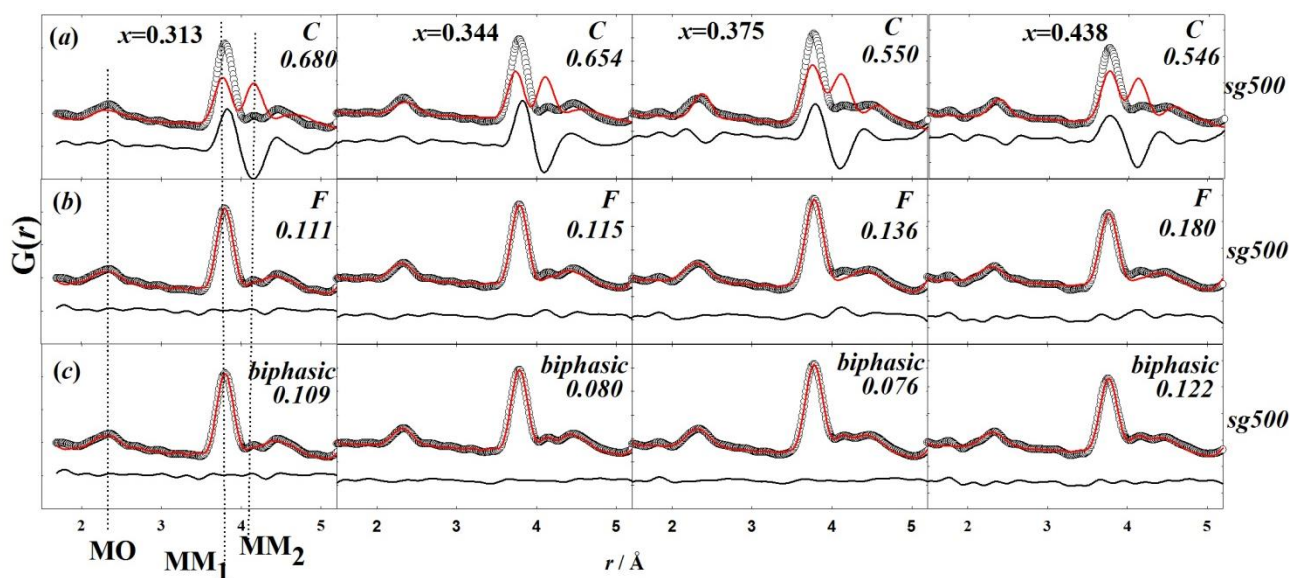

**Figure SI7.** Refinements of the local scale of PDF data for (a) single C-type, (b) single fluorite and (c) biphasic model for the four compositions investigated prepared via sg500. The fit residual  $R_w$  is indicated in each panel.
